# Supplementary material
Source: MDPI journal article supplement (https://www.mdpi.com/2304-6732/8/11/505)
Supplement: s1 [file s1]

# Photocurrent Enhancement of PtSe<sub>2</sub> Photodetectors by Using Au Nanorods

## SUPPORTING INFORMATION

Tatsuya Nakazawa <sup>1,2</sup>, Donghyun Kim <sup>1</sup>, Shinichi Kato <sup>3,4</sup>, Jusang Park <sup>1</sup>, Jwamin Nam <sup>3</sup>  
and Hyungjun Kim <sup>1,\*</sup>

<sup>1</sup> School of Electrical and Electronic Engineering, Yonsei University, 262 Seongsanno, Seodaemun-gu, Seoul 03722, Korea; t-nakazawa@yonsei.ac.kr (T.N.); kdh9319@yonsei.ac.kr (D.K.); jusang@yonsei.ac.kr (J.P.)

<sup>2</sup> Tanaka Kikinzoku Kogyo K.K. Isehara Technical Center, Metallic Materials Development Department, 28 Suzukawa, Isehara 259-1146, Kanagawa, Japan

<sup>3</sup> Department of Chemistry, Seoul National University, 1 Gwanak-ro, Gwanak-gu, Seoul 08826, Korea; 2019-20165@snu.ac.kr (S.K.); jmnam@snu.ac.kr (J.N.)

<sup>4</sup> Tanaka Kikinzoku Kogyo K.K. Hiratsuka Technical Center, Biochemical Development Department, 2-73 Shinmachi, Hiratsuka 254-0076, Kanagawa, Japan

\* Correspondence: hyungjun@yonsei.ac.kr

(a)

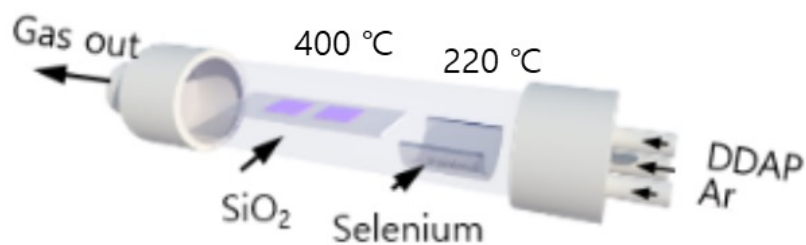

(b)

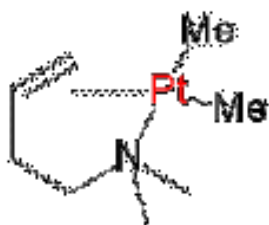

(c)

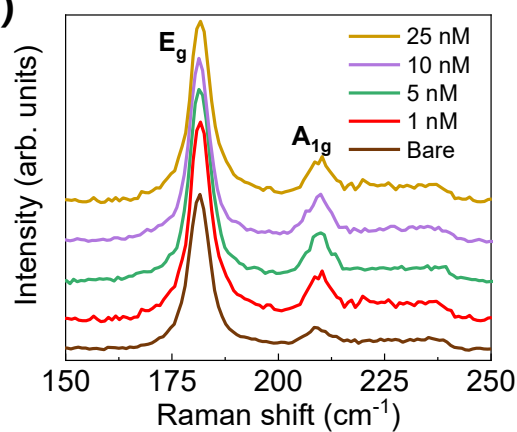

(d)

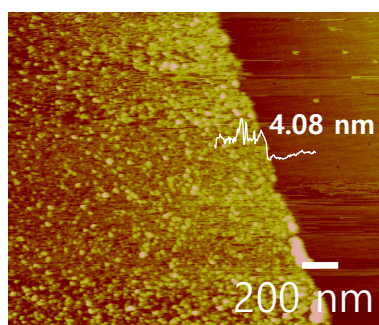

(e)

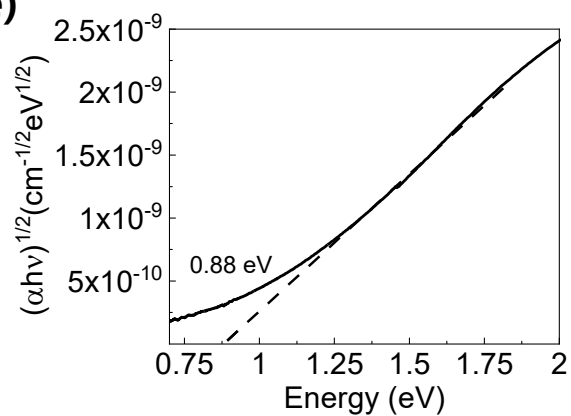

**Figure S1.** (a) Schematic diagram of the CVD process of 2D PtSe<sub>2</sub>, (b) Structure of DDAP, (c) Raman spectrum of 2D PtSe<sub>2</sub> before and after Au nanorods spin-coating. (d) AFM image of 2D PtSe<sub>2</sub>. (e) Tauc-plot of 2D PtSe<sub>2</sub> calculated from UV-vis-NIR spectra.

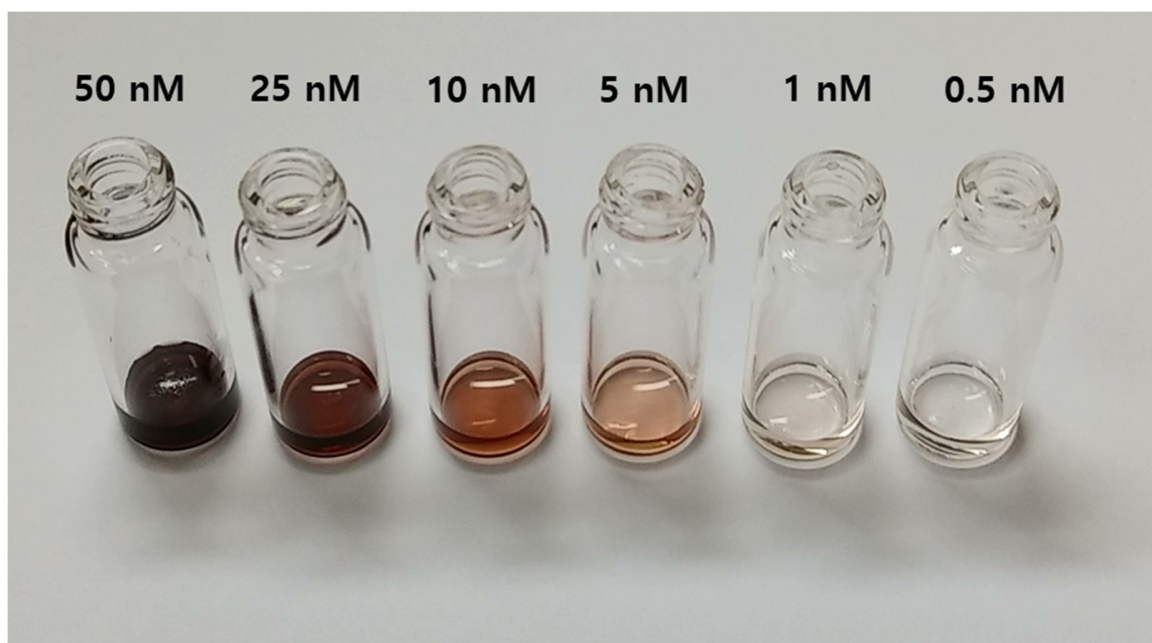

**Figure S2** Picture of adjusted concentration Au nanorods solution.

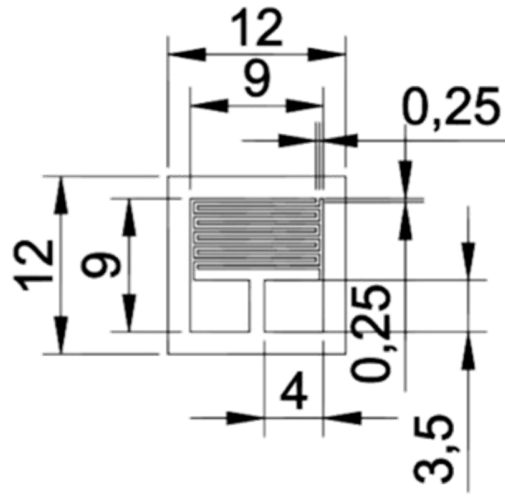

**Figure S3:** Dimensional drawing of the interdigitated comb shadow mask (unit: mm).

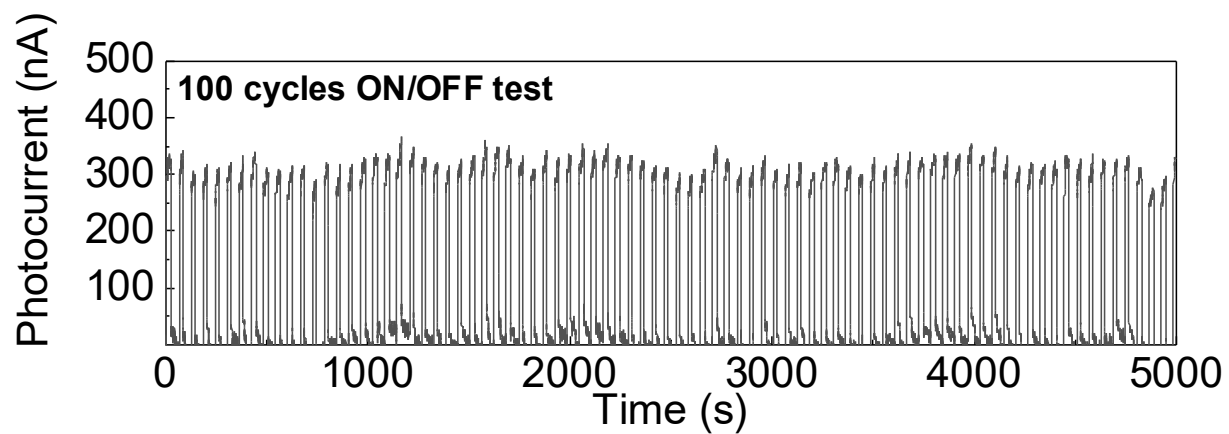

**Figure S4.** ON/OFF cyclic performance test of 5 nM Au nanorods/2D PtSe<sub>2</sub> at 940 nm.

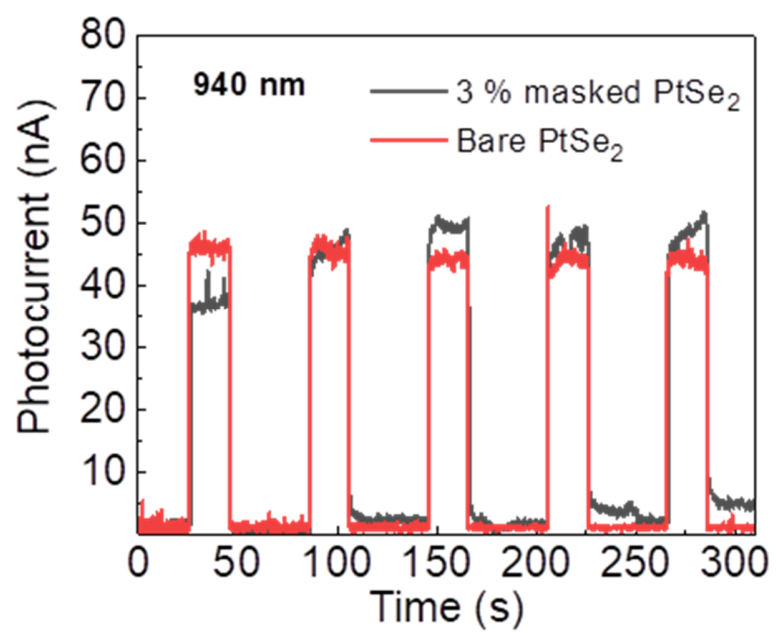

**Figure S5.** Photocurrent comparison of 3% masked Au nanorods/2D PtSe<sub>2</sub> and bare 2D PtSe<sub>2</sub> at 940 nm.
